# Supplementary material
Source: Springer Nature journal article supplement (https://www.springermedizin.de/resource/supplementary/12985_2009_781_MOESM6_ESM.pdf/9609148)

**S-3 GFP**

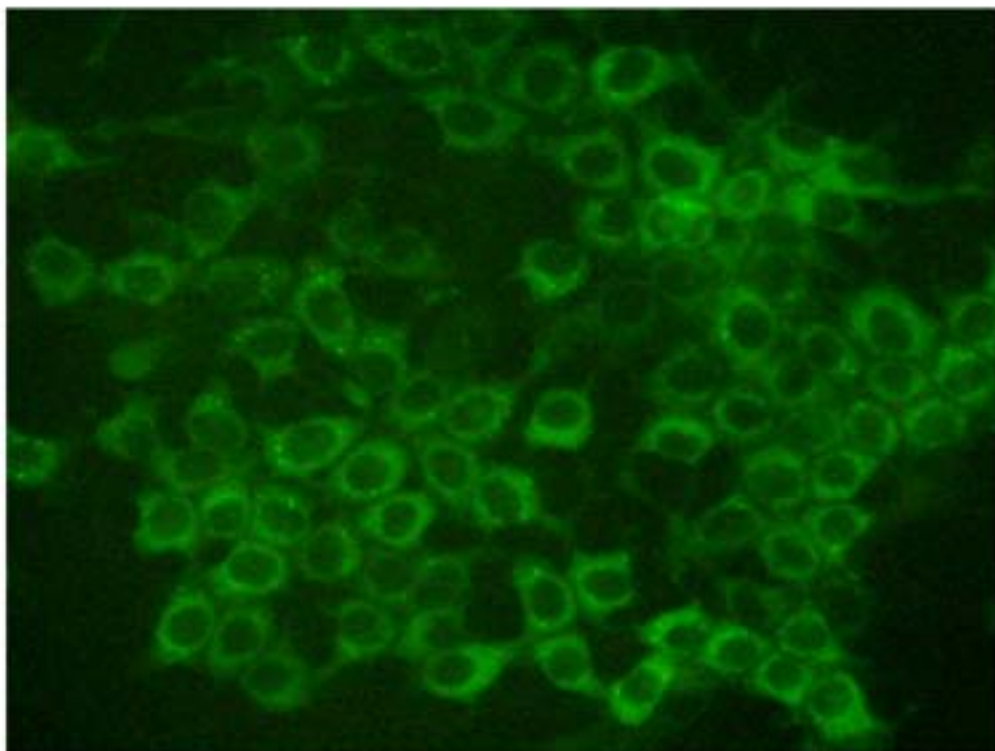

**R-4 GFP**

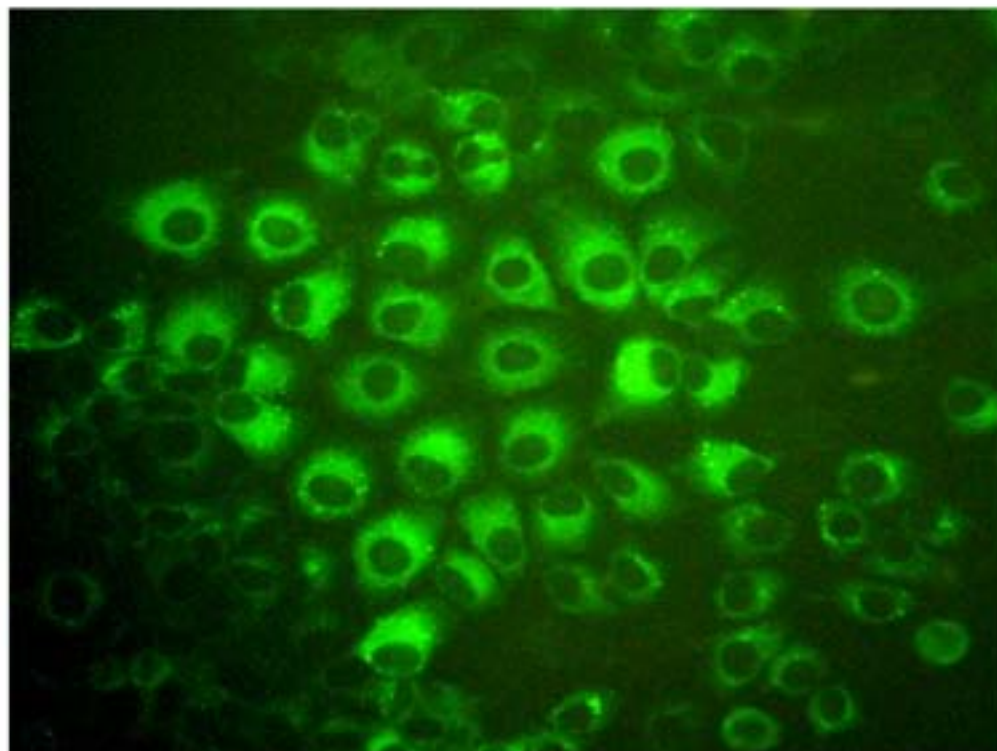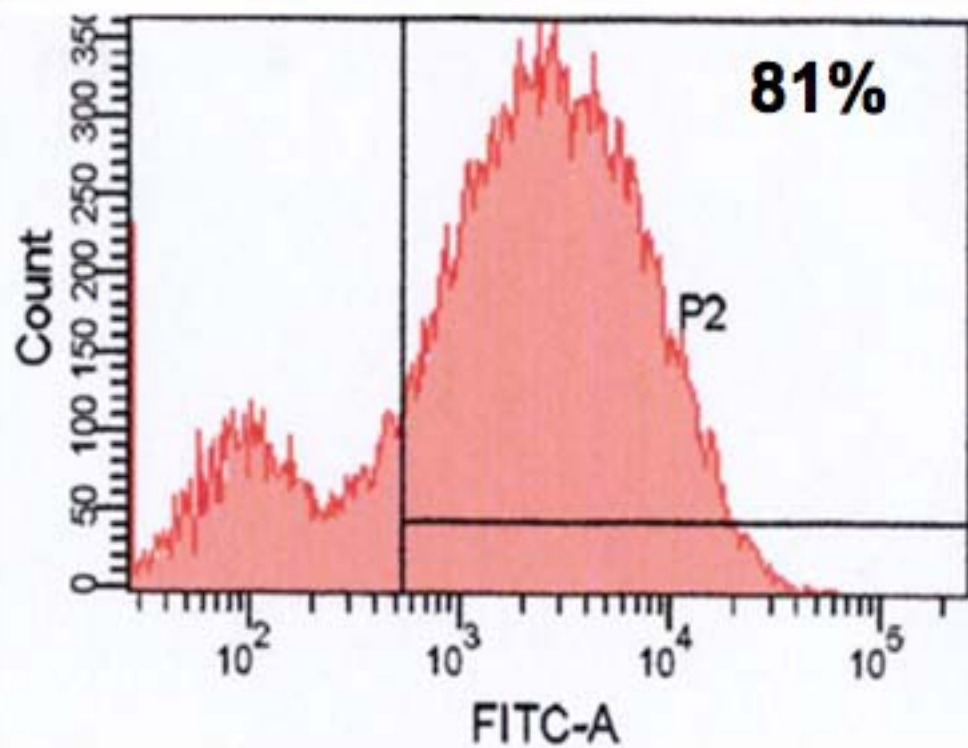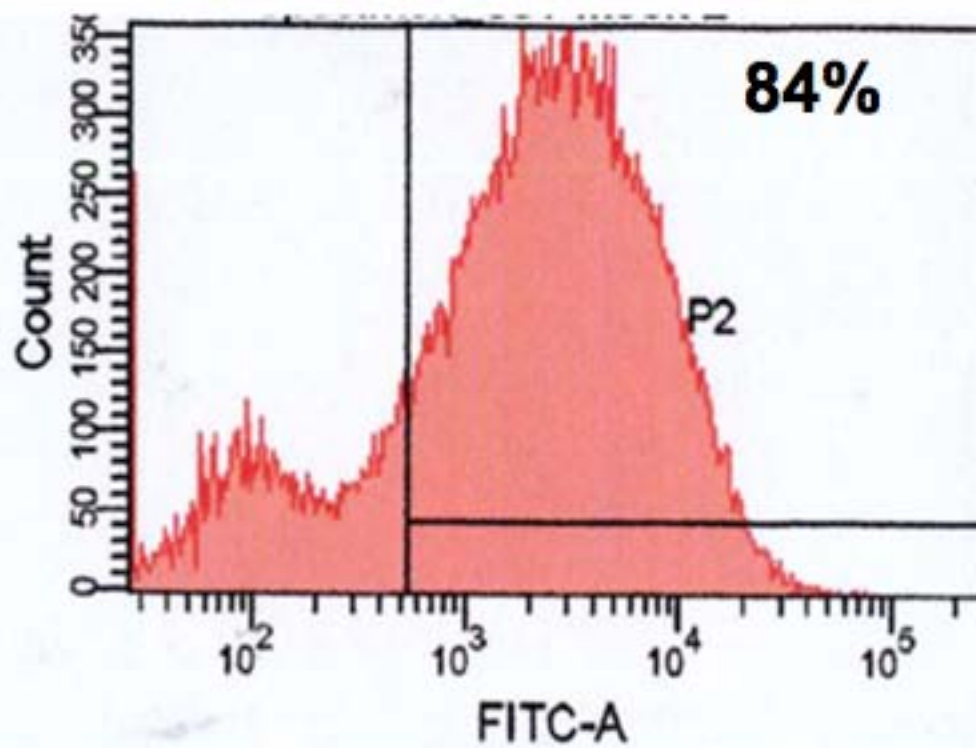

Supplement: MOESM6 [file 9609148]
